# Supplementary material for: Explainable Machine Learning Models for Predicting Health-Related Quality of Life in High-Risk Cardiovascular Populations: A Comparative Analysis of SF-12 Data and Clinical Risk Stratification
Source: Research Square preprint supplement (doi:10.21203/rs.3.rs-7413340/v1), 2025-09-30
Supplement: Supplementary file 1 [file 7dcbd199129abc5b1b772ff4.docx]

| **Supplementary Table S1. Comparison of Sample Characteristics by PCS/MCS Group Stratification** | | | | | | | | | | | |
| --- | --- | --- | --- | --- | --- | --- | --- | --- | --- | --- | --- |
| ****Characteristics**** | |  | **Low PCS Group  (n=4084)** | **High PCS Group  (n=4773)** | **χ²** | **p-value** |  | **Low MCS Group  (n=3535)** | **High MCS Group  (n=5322)** | **χ²** | **p-value** |
| Age[n (%)] |  |  |  |  | 245.758 | <0.001 |  |  |  | 56.004 | <0.001 |
|  | 35–44 years |  | 47（1.2） | 117（2.5） |  |  |  | 42(1.2) | 122(2.3) |  |  |
|  | 45–54 years |  | 349（8.5） | 693（14.5） |  |  |  | 351(9.9) | 691(13.0) |  |  |
|  | 55–64 years |  | 1018（24.9） | 1612（33.8） |  |  |  | 987(27.9) | 1643(30.9) |  |  |
|  | ≥65 years |  | 2670（65.4） | 2351（49.3） |  |  |  | 2155(61.0) | 2866(53.9) |  |  |
| Gender[n (%)] |  |  |  |  | 130.782 | <0.001 |  |  |  | 60.758 | <0.001 |
|  | Male |  | 1981（48.5） | 2894（60.6） |  |  |  | 1767(50.0) | 3108(58.4) |  |  |
|  | Female |  | 2103（51.5） | 1879（39.4） |  |  |  | 1768(50.0) | 2214(41.6) |  |  |
| Education Level[n (%)] |  |  |  |  | 165.272 | <0.001 |  |  |  | 24.109 | <0.001 |
|  | Primary school or below |  | 2531（62.0） | 2308（48.4） |  |  |  | 2040(57.7) | 2799(52.6) |  |  |
|  | Junior/High school |  | 1431（35.0） | 2254（47.2） |  |  |  | 1360(38.5) | 2325(43.7) |  |  |
|  | College/University or above |  | 122（3.0） | 211（4.4） |  |  |  | 135(3.8) | 198(3.7) |  |  |
| Marital Status[n (%)] |  |  |  |  | 55.917 | <0.001 |  |  |  | 6.403 | 0.041 |
|  | Unmarried |  | 42（1.0） | 52（1.1） |  |  |  | 30(0.8) | 64(1.2) |  |  |
|  | Married/Cohabiting |  | 3585（87.8） | 4402（92.2） |  |  |  | 3169(89.6) | 4818(90.5) |  |  |
|  | Other (Widowed/Divorced/Separated/Other) |  | 457（11.2） | 319（6.7） |  |  |  | 336(9.5) | 440(8.3) |  |  |
| Occupation[n (%)] |  |  |  |  | 134.98 | <0.001 |  |  |  | 26.586 | <0.001 |
|  | Blue-collar workers |  | 1424（34.9） | 1742（36.5） |  |  |  | 1254(35.5) | 1912(35.9) |  |  |
|  | Service workers |  | 114（2.8） | 224（4.7） |  |  |  | 112(3.2) | 226(4.2) |  |  |
|  | White-collar workers |  | 131（3.2） | 275（5.8） |  |  |  | 150(4.2) | 256(4.8) |  |  |
|  | Unemployed |  | 437（10.7） | 419（8.8） |  |  |  | 344(9.7) | 512(9.6) |  |  |
|  | Homemakers |  | 960（23.5） | 764（16.0） |  |  |  | 769(218) | 955(17.9) |  |  |
|  | Retired individuals |  | 1018（24.9） | 1349（28.3） |  |  |  | 906(25.6) | 1461(27.5) |  |  |
| Smoking[n (%)] |  |  |  |  | 117.917 | <0.001 |  |  |  | 82.154 | <0.001 |
|  | Never smoked |  | 2852（69.8） | 2889（60.5） |  |  |  | 2490(70.4) | 3251(61.1) |  |  |
|  | Current daily smoker |  | 754（18.5） | 1337（28.0） |  |  |  | 696(19.7) | 1395(26.2) |  |  |
|  | Current non-daily smoker |  | 95（2.3） | 135（2.8） |  |  |  | 83(2.3) | 147(2.8) |  |  |
|  | Former smoker |  | 383（9.4） | 412（8.6） |  |  |  | 266(7.5) | 529(9.9) |  |  |
| Alcohol Consumption[n (%)] |  |  |  |  | 110.182 | <0.001 |  |  |  | 40.956 | <0.001 |
|  | Non-drinker |  | 3162（77.4） | 3216（67.4） |  |  |  | 2678(75.8) | 3700(69.5) |  |  |
|  | Alcohol drinker |  | 922（22.6） | 1557（32.6） |  |  |  | 857(24.2) | 1622(30.5) |  |  |
| Tea Consumption[n (%)] |  |  |  |  | 55.514 | <0.001 |  |  |  | 90.91 | <0.001 |
|  | Never drank tea |  | 2013（49.3） | 2047（42.9） |  |  |  | 1806(51.1) | 2254(42.4) |  |  |
|  | Regular tea drinker (≥1 time/week) |  | 1284（31.4） | 1848（38.7） |  |  |  | 1055(29.8) | 2077(39.0) |  |  |
|  | Former tea drinker |  | 88（2.2） | 80（1.7） |  |  |  | 55(1.6) | 113(2.1) |  |  |
|  | Occasional tea drinker (<1 time/week) |  | 699（17.1） | 798（16.7） |  |  |  | 619(17.5) | 878(16.5) |  |  |
| MET[n (%)] |  |  |  |  | 38.745 | <0.001 |  |  |  | 46.689 | <0.001 |
|  | Insufficient activity (<600) |  | 954(23.4) | 1050(22) |  |  |  | 911(25.8) | 1093(20.5) |  |  |
|  | Low activity (600–3,999) |  | 1942(47.6) | 2126(44.5) |  |  |  | 1620(45.8) | 2448(46.0) |  |  |
|  | Moderate activity (4,000–7,999) |  | 771(18.9) | 904(18.9) |  |  |  | 628(17.8) | 1047(19.7) |  |  |
|  | Sufficient activity (≥8,000) |  | 417(10.2) | 693(14.5) |  |  |  | 376(10.6) | 734(13.8) |  |  |
| Sleep[n (%)] |  |  |  |  | 48.17 | <0.001 |  |  |  | 15.407 | <0.001 |
|  | Short sleep (<7 h/night) |  | 1404(34.4) | 1371(28.7) |  |  |  | 1190(33.7) | 1585(29.8) |  |  |
|  | Adequate sleep (7–9 h/night) |  | 2160(52.9) | 2873(60.2) |  |  |  | 1930(54.6) | 3103(58.3) |  |  |
|  | Excessive sleep (≥9 h/night) |  | 520(12.7) | 529(11.1) |  |  |  | 415(11.7) | 634(11.9) |  |  |
| BMI[n (%)] |  |  |  |  | 16.177 | <0.001 |  |  |  | 15.192 | 0.002 |
|  | Underweight (<18.5kg/m²) |  | 65(1.6) | 43(0.9) |  |  |  | 54(1.5) | 54(1.0) |  |  |
|  | Normal weight (18.5–23.9kg/m²) |  | 1212(29.7) | 1301(27.3) |  |  |  | 1066(30.2) | 1447(27.2) |  |  |
|  | Overweight (24.0–27.9kg/m²) |  | 1839(45.0) | 2249(47.1) |  |  |  | 1572(44.5) | 2516(47.3) |  |  |
|  | Obese (≥28.0kg/m²) |  | 968(23.7) | 1180(24.7) |  |  |  | 843(23.8) | 1305(24.5) |  |  |
| Hypertension[n (%)] |  |  |  |  | 0.671 | 0.413 |  |  |  | 2.217 | 0.136 |
|  | No |  | 793(19.4) | 960(20.1) |  |  |  | 727(20.6) | 1026(19.3) |  |  |
|  | Yes |  | 3291(80.6) | 3813(79.9) |  |  |  | 2808(79.4) | 4296(80.7) |  |  |
| Diabetes Mellitus[n (%)] |  |  |  |  | 3.344 | 0.067 |  |  |  | 4.093 | 0.043 |
|  | No |  | 2393(58.6) | 2888(60.5) |  |  |  | 2062(58.3) | 3219(60.5) |  |  |
|  | Yes |  | 1691(41.4) | 1885(39.5) |  |  |  | 1473(41.7) | 2103(39.5) |  |  |
| Dyslipidemia[n (%)] |  |  |  |  | 13.074 | <0.001 |  |  |  | 0.095 | 0.758 |
|  | No |  | 1933(47.3) | 2076(43.5) |  |  |  | 1593(45.1) | 2416(45.4) |  |  |
|  | Yes* |  | 2151(52.7) | 2697(56.5) |  |  |  | 1942(54.9) | 2906(54.6) |  |  |

*(TC ≥6.2 mmol/L **and/or** TG ≥2.3 mmol/L **and/or** HDL-C <1.0 mmol/L **and/or** LDL-C ≥4.1 mmol/L）
